# Supplementary material for: JMJD3 promotes the epithelial-mesenchymal transition and migration of glioma cells via the CXCL12/CXCR4 axis
Source: PubMed Central journal article supplement — Oncol Lett. 2019 Oct 9;18(6):5930–40. doi: 10.3892/ol.2019.10972 (PMC6865580; doi:10.3892/ol.2019.10972), 2019-10-09
Supplement: Supplementary_Data.pdf [file Supplementary_Data.pdf]

Figure S1. Transfection effects on target genes in cells used for western blotting, ChIP, wound healing and Transwell assays. mRNA expression levels of JMJD3 in (A) U-251MG or (B) U-87MG ATCC cells which were transfected with pCMV-HA control vector, scRNA control vector, JMJD3 vector or JMJD3 shRNA vector for 48 h. mRNA expression levels of JMJD3 in (C) U-251MG or (D) U-87MG ATCC cells which were transfected with pCMV-HA control vector, pLV-MCS control vector, JMJD3 vector, CXCL12 vector or JMJD3 vector coupled with AMD3100 for 48 h. mRNA expression levels of CXCL12 in (E) U-251MG or (F) U-87MG ATCC cells which transfected with pCMV-HA control vector, pLV-MCS control vector, CXCL12 vector or CXCL12 vector coupled with GSK-J4 for 48 h. \*\*P<0.01. ATCC, American Type Culture Collection; ChIP, chromatin immunoprecipitation; CXCL12, C-X-C motif chemokine ligand 12; JMJD3, Jumonji domain-containing protein 3; n.s., not significant; scRNA, scrambled RNA; shRNA, short hairpin RNA.

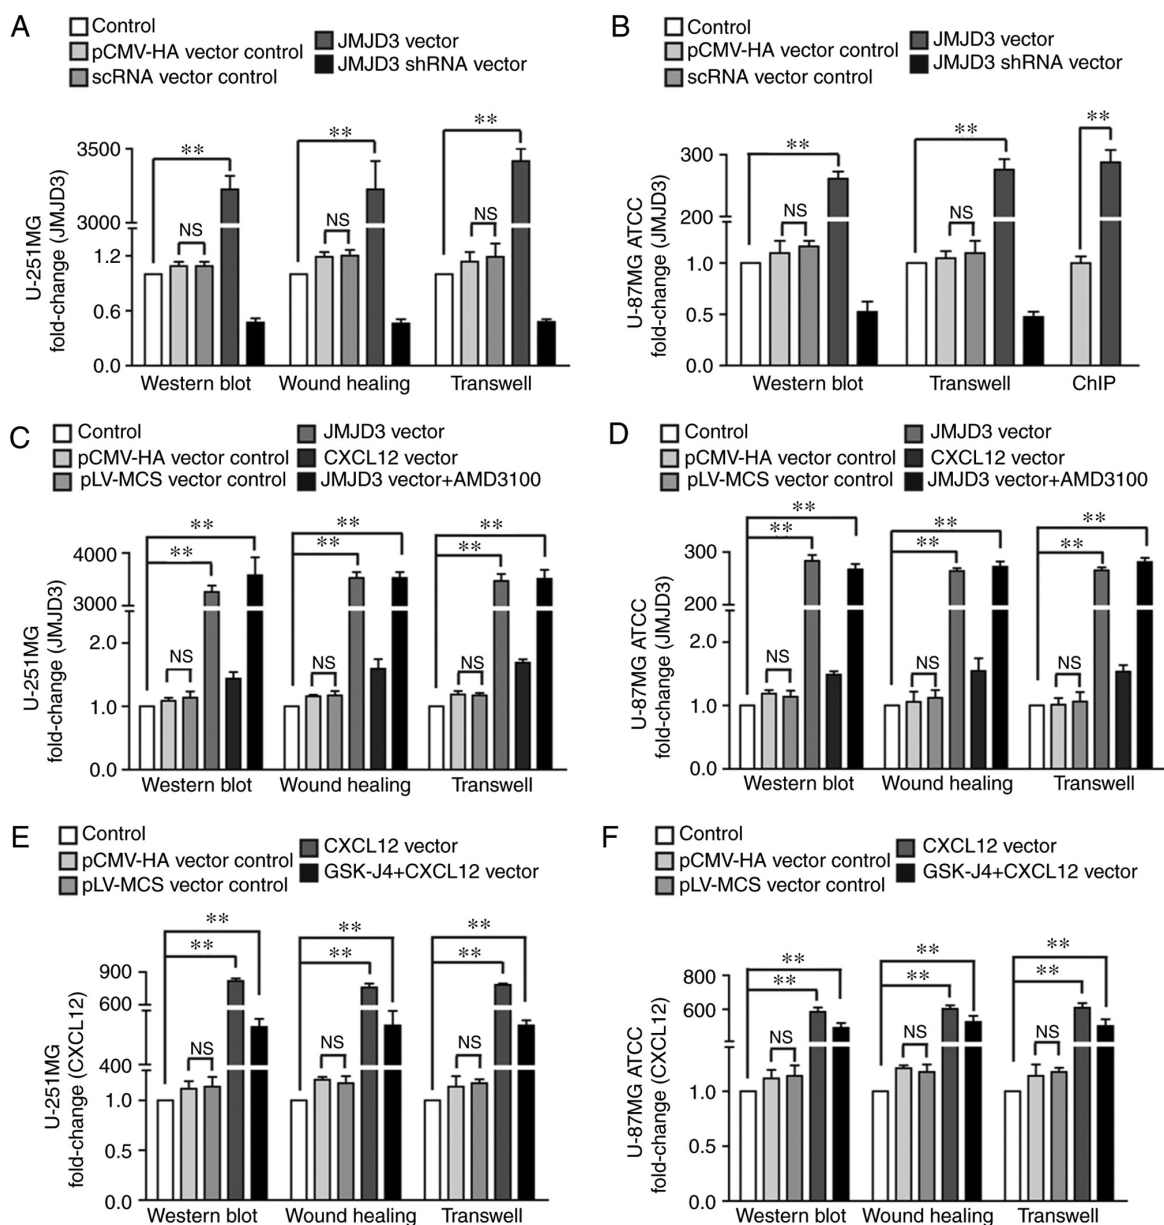

Table S1. Basic information of patients with glioma.

| Tissue no. | Histologic type | Neoplastic organ | Sex    | Age (years) | Primary organ | Metastasis | Pathological classification | TNM grade |
|------------|-----------------|------------------|--------|-------------|---------------|------------|-----------------------------|-----------|
| 1          | Carcinoma       | Brain            | Female | 43          | Yes           | No         | Pilocytic astrocytoma       | I         |
| 2          | Carcinoma       | Brain            | Male   | 45          | Yes           | No         | Pilocytic astrocytoma       | I         |
| 3          | Carcinoma       | Brain            | Female | 50          | Yes           | No         | Subependymoma               | I-II      |
| 4          | Carcinoma       | Brain            | Female | 34          | Yes           | No         | Astrocytoma                 | II        |
| 5          | Carcinoma       | Brain            | Female | 30          | Yes           | No         | Astrocytoma                 | II        |
| 6          | Carcinoma       | Brain            | Male   | 39          | Yes           | No         | Astrocytoma                 | II        |
| 7          | Carcinoma       | Brain            | Female | 52          | Yes           | No         | Astrocytoma                 | II        |
| 8          | Carcinoma       | Brain            | Female | 44          | Yes           | No         | Diffuse astrocytoma         | II        |
| 9          | Carcinoma       | Brain            | Female | 58          | Yes           | No         | Astrocytoma                 | II        |
| 10         | Carcinoma       | Brain            | Male   | 27          | Yes           | No         | Diffuse astrocytoma         | II        |
| 11         | Carcinoma       | Brain            | Male   | 44          | Yes           | No         | Diffuse astrocytoma         | II        |
| 12         | Carcinoma       | Brain            | Female | 43          | Yes           | No         | Diffuse astrocytoma         | II        |
| 13         | Carcinoma       | Brain            | Female | 72          | Yes           | No         | Astrocytoma                 | II        |
| 14         | Carcinoma       | Brain            | Male   | 56          | Yes           | No         | Astrocytoma                 | II        |
| 15         | Carcinoma       | Brain            | Male   | 58          | Yes           | No         | Diffuse astrocytoma         | II        |
| 16         | Carcinoma       | Brain            | Male   | 65          | Yes           | No         | Diffuse astrocytoma         | II        |
| 17         | Carcinoma       | Brain            | Female | 30          | Yes           | No         | Anaplastic astrocytoma      | III       |
| 18         | Carcinoma       | Brain            | Male   | 51          | Yes           | No         | Anaplastic astrocytoma      | III       |
| 19         | Carcinoma       | Brain            | Female | 62          | Yes           | No         | Anaplastic astrocytoma      | III       |
| 20         | Carcinoma       | Brain            | Female | 36          | Yes           | No         | Anaplastic astrocytoma      | III       |
| 21         | Carcinoma       | Brain            | Male   | 61          | Yes           | No         | Astrocytoma                 | III       |
| 22         | Carcinoma       | Brain            | Female | 57          | Yes           | No         | Anaplastic astrocytoma      | III       |
| 23         | Carcinoma       | Brain            | Female | 73          | Yes           | No         | Anaplastic astrocytoma      | III       |
| 24         | Carcinoma       | Brain            | Female | 50          | Yes           | No         | Anaplastic astrocytoma      | III       |
| 25         | Carcinoma       | Brain            | Male   | 60          | Yes           | No         | Anaplastic astrocytoma      | III       |
| 26         | Carcinoma       | Brain            | Male   | 65          | Yes           | No         | Anaplastic astrocytoma      | III       |
| 27         | Carcinoma       | Brain            | Female | 63          | Yes           | No         | Anaplastic astrocytoma      | III       |
| 28         | Carcinoma       | Brain            | Male   | 31          | Yes           | No         | Anaplastic astrocytoma      | III       |
| 29         | Carcinoma       | Brain            | Female | 64          | Yes           | No         | Anaplastic astrocytoma      | III       |
| 30         | Carcinoma       | Brain            | Female | 64          | Yes           | No         | Anaplastic astrocytoma      | III-IV    |
| 31         | Carcinoma       | Brain            | Male   | 56          | Yes           | No         | Anaplastic astrocytoma      | III-IV    |
| 32         | Carcinoma       | Brain            | Female | 49          | Yes           | No         | Astrocytoma                 | IV        |
| 33         | Carcinoma       | Brain            | Male   | 34          | Yes           | No         | Glioblastoma multiforme     | IV        |
| 34         | Carcinoma       | Brain            | Male   | 59          | Yes           | No         | Glioblastoma multiforme     | IV        |
| 35         | Carcinoma       | Brain            | Male   | 59          | Yes           | No         | Glioblastoma multiforme     | IV        |
| 36         | Carcinoma       | Brain            | Male   | 65          | Yes           | No         | Glioblastoma multiforme     | IV        |
| 37         | Carcinoma       | Brain            | Female | 63          | Yes           | No         | Glioblastoma multiforme     | IV        |
| 38         | Carcinoma       | Brain            | Female | 72          | Yes           | No         | Glioblastoma                | IV        |
| 39         | Carcinoma       | Brain            | Male   | 48          | Yes           | No         | Glioblastoma                | IV        |
| 40         | Carcinoma       | Brain            | Male   | 54          | Yes           | No         | Glioblastoma                | IV        |
| 41         | Carcinoma       | Brain            | Female | 64          | Yes           | No         | Glioblastoma                | IV        |
| 42         | Carcinoma       | Brain            | Male   | 65          | Yes           | No         | Glioblastoma                | IV        |
| 43         | Carcinoma       | Brain            | Male   | 58          | Yes           | No         | Glioblastoma                | IV        |
| 44         | Carcinoma       | Brain            | Female | 66          | Yes           | No         | Glioblastoma                | IV        |
| 45         | Carcinoma       | Brain            | Female | 48          | Yes           | No         | Glioblastoma                | IV        |
| 46         | Carcinoma       | Brain            | Male   | 56          | Yes           | No         | Glioblastoma                | IV        |
| 47         | Carcinoma       | Brain            | Female | 61          | Yes           | No         | Glioblastoma                | IV        |
| 48         | Carcinoma       | Brain            | Female | 60          | Yes           | No         | Glioblastoma                | IV        |
| 49         | Carcinoma       | Brain            | Male   | 56          | Yes           | No         | Glioblastoma                | IV        |
| 50         | Carcinoma       | Brain            | Female | 75          | Yes           | No         | Glioblastoma                | IV        |
| 51         | Carcinoma       | Brain            | Male   | 57          | Yes           | No         | Glioblastoma                | IV        |
| 52         | Carcinoma       | Brain            | Male   | 35          | Yes           | No         | Glioblastoma                | IV        |
| 53         | Carcinoma       | Brain            | Male   | 70          | Yes           | No         | Glioblastoma                | IV        |
| 54         | Carcinoma       | Brain            | Male   | 64          | Yes           | No         | Glioblastoma                | IV        |
| 55         | Carcinoma       | Brain            | Male   | 63          | Yes           | No         | Glioblastoma                | IV        |

Table SI. Continued.

| Tissue no. | Histologic type | Neoplastic organ | Sex    | Age (years) | Primary organ | Metastasis | Pathological classification | TNM grade |
|------------|-----------------|------------------|--------|-------------|---------------|------------|-----------------------------|-----------|
| 56         | Carcinoma       | Brain            | Female | 53          | Yes           | No         | Glioblastoma                | IV        |
| 57         | Carcinoma       | Brain            | Female | 65          | Yes           | No         | Glioblastoma                | IV        |
| 58         | Carcinoma       | Brain            | Male   | 56          | Yes           | No         | Glioblastoma                | IV        |
| 59         | Carcinoma       | Brain            | Female | 63          | Yes           | No         | Glioblastoma                | IV        |
| 60         | Carcinoma       | Brain            | Male   | 59          | Yes           | No         | Glioblastoma                | IV        |
